# Supplementary material for: GeneCount: genome-wide calculation of absolute tumor DNA copy numbers from array comparative genomic hybridization data
Source: PubMed Central journal article supplement (PMC2441472; doi:10.1186/gb-2008-9-5-r86), 2008-05-23
Supplement: gb-2008-9-5-r86-S1.pdf [file gb-2008-9-5-r86-S1.pdf]

# Additional data file 1

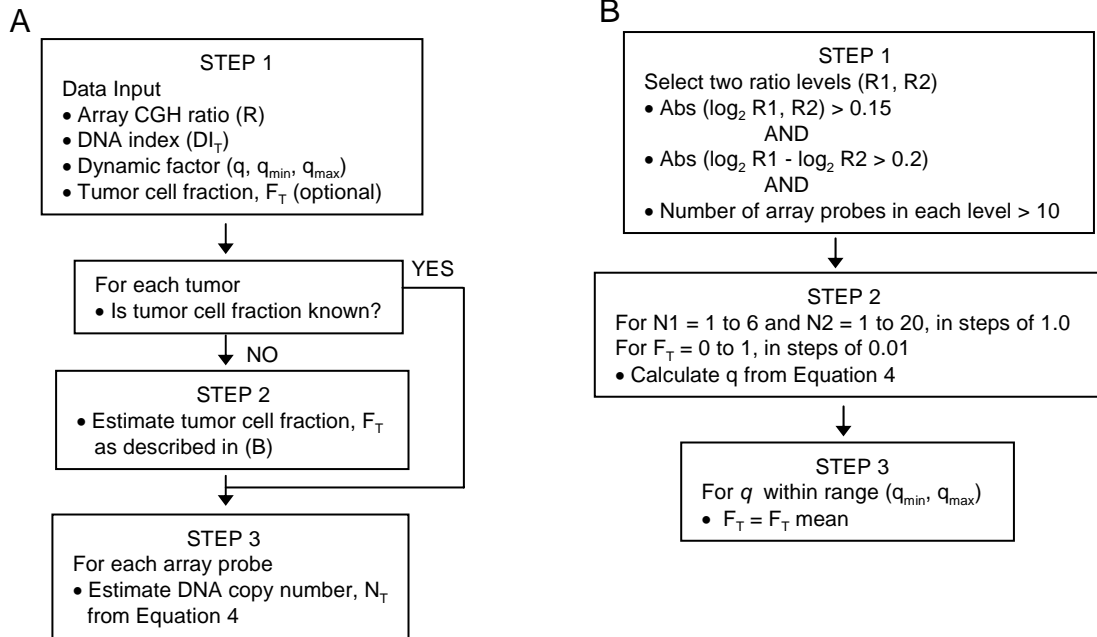

## Calculation steps in GeneCount.

Flow diagrams of the entire GeneCount procedure (A) and the estimation of tumor cell fraction (B) are shown. Data input in (A) includes the aCGH ratio levels,  $R$ , derived from statistical analysis tools, the DNA index ( $DI_T$ ) of the tumor cells, the dynamic factor,  $q$ , of the experiment, and the tumor cell fraction,  $F_T$ .  $F_T$  can either be measured by a separate technique like flow cytometry, or estimated by the procedure in (B). In the former case, a fixed  $q$ -value, as determined from control experiments, is used. Otherwise,  $q$  is estimated for each tumor as indicated in (B), allowing for a deviation of typically 10% (range  $q_{min} - q_{max}$ ) from the value determined in control experiments. To calculate tumor cell fraction, two ratio levels,  $R1$  and  $R2$ , are selected, and the DNA copy numbers  $N1$  and  $N2$ , corresponding to  $R1$  and  $R2$ , respectively, are predicted in a stepwise manner by increasing  $N1$  from 1 to 6 and  $N2$  from 1 to 20 in steps of 1.  $R1$ ,  $R2$ , and the incremental values of  $N1$  and  $N2$  are used in a simulation procedure based on Equation 4, allowing  $F_T$  to vary from 0 to 1 in steps of 0.01, and calculating the corresponding  $q$ . The  $F_T$  values obtained for  $q$  within the range  $q_{min} - q_{max}$  are used to calculate a mean  $F_T$  representative of the tumor. The mean  $F_T$  is further used as input to the algorithm in (A) to calculate the DNA copy numbers of all array probes. The criteria used to select  $R1$  and  $R2$  for estimation of tumor cell fraction are described in the Materials and methods section of the paper. The source code of the GeneCount module is available by communication to the authors.
