# Supplementary material for: GeneCount: genome-wide calculation of absolute tumor DNA copy numbers from array comparative genomic hybridization data
Source: PubMed Central journal article supplement (PMC2441472; doi:10.1186/gb-2008-9-5-r86), 2008-05-23
Supplement: gb-2008-9-5-r86-S8.pdf [file gb-2008-9-5-r86-S8.pdf]

## Additional data file 8

**Table 1. DNA copy number heterogeneity in non-Hodgkin's lymphomas**

| Patient | DNA index | DNA region <sup>a</sup>                                        | DNA copy number |
|---------|-----------|----------------------------------------------------------------|-----------------|
| L122/84 | 1.23      | 17q24-ter                                                      | 1&2             |
| L255/85 | 1.04      | 12p                                                            | 1&2             |
| L358/87 | 1.94      | 9pter-q21, 9q31-ter                                            | 3&4             |
| L47/88  | 1.00      | 11q14-22                                                       | 1&2             |
| L154/88 | 0.95      | 4                                                              | 1&2             |
| L399/88 | 1.00      | 11q13-14, X (male)                                             | 1&2             |
|         |           | 22                                                             | 2&3             |
| L064/89 | 1.26      | 17                                                             | 2&3             |
| L309/89 | 1.83      | 8, 9, 17q21-ter                                                | 3&4             |
| L339/89 | 1.00      | 17q21-25                                                       | 2&3             |
| L034/90 | 1.16      | X (male)                                                       | 1&2             |
| L472/90 | 1.16      | X                                                              | 2&3             |
| L577/90 | 1.97      | 4                                                              | 2&3             |
|         |           | 11                                                             | 3&4             |
|         |           | 3                                                              | 4&5             |
| L382/91 | 1.02      | 13q32-ter                                                      | 1&2             |
| L383/91 | 0.97      | 11q22-23, 15q25-ter                                            | 1&2             |
| L436/91 | 1.04      | Xq26-ter (male)                                                | 1&2             |
| L462/91 | 1.00      | 3pcen-14, 3p21-22, 3p24-ter, 15qcen-15, 17p11-ter              | 1&2             |
| L008/92 | 1.00      | 2q, 5p13-ter, 7q31-ter, 9p21-23, 13q14-31, 20q13-ter, Xp22-ter | 1&2             |
| L037/92 | 1.00      | 19                                                             | 1&2             |
| L117/92 | 1.00      | 4                                                              | 1&2             |

<sup>a</sup>The aCGH ratios of the heterogeneous DNA region were significantly different from those of the homogeneous regions in all cases, as verified from ANOVA analysis.
