# Supplementary material for: GeneCount: genome-wide calculation of absolute tumor DNA copy numbers from array comparative genomic hybridization data
Source: PubMed Central journal article supplement (PMC2441472; doi:10.1186/gb-2008-9-5-r86), 2008-05-23
Supplement: gb-2008-9-5-r86-S9.pdf [file gb-2008-9-5-r86-S9.pdf]

## Additional data file 9

**Table 2. DNA copy number heterogeneity in cervical cancers**

| Patient | DNA index | DNA region <sup>a</sup>                              | DNA copy number |
|---------|-----------|------------------------------------------------------|-----------------|
| C002/01 | 1.00      | 1p34-ter, 10, 16, 17, 19, 20                         | 1&2             |
|         |           | 2pter-q33, 5p14-q14, 6, 7p11-ter, 8, 12pter-q23, X   | 2&3             |
| C003/01 | 1.90      | 5pter-q12, 6, 11pter-q12, 12, 13q21-31, Xp           | 3&4             |
| C004/01 | 1.00      | 17q23-ter, X                                         | 2&3             |
| C005/01 | 1.70      | 1p33-ter, 4, 7q, Xpter-q27                           | 2&3             |
|         |           | 3q, 6q13-ter, 7p, 10pter-q24, 11pter-q22, 17, 18, 20 | 3&4             |
| C006/01 | 1.30      | 6q24-ter                                             | 1&2             |
|         |           | 1p32-ter, 11q12-13, 17q, 18, 19, 22q                 | 2&3             |
| C008/01 | 1.00      | 9q                                                   | 2&3             |
| C014/01 | 1.94      | 3p                                                   | 3&4             |
| C023/01 | 1.00      | 2q33-ter, 4, 8p                                      | 1&2             |
|         |           | 1p32-qter, 3, 7q21-ter                               | 2&3             |
| C024/01 | 1.00      | 1p31-ter, 2q21-ter, 4p, 8p, 13qcen-34                | 1&2             |
|         |           | 6p                                                   | 2&3             |
| C025/01 | 1.00      | 21qcen-21, X                                         | 1&2             |
|         |           | 9                                                    | 2&3             |
| C028/01 | 1.00      | X                                                    | 1&2             |
|         |           | 9                                                    | 2&3             |
| C041/01 | 1.34      | 8                                                    | 3&4             |
| C045/01 | 1.00      | 3p                                                   | 1&2             |
| C053/01 | 1.00      | 1p34-ter                                             | 1&2             |
| C054/01 | 1.00      | 2q33-ter, 9qcen-22, Xq22-ter                         | 1&2             |
|         |           | 15                                                   | 2&3             |
| C078/02 | 1.70      | 5q, Xpter-q28                                        | 3&4             |
| C092/02 | 1.00      | 3p, 8p12-ter, 17, 19, 20, 22                         | 1&2             |
|         |           | 1p34-ter, 2p13-ter, 8p12-q11, 8q13-ter, 13q, 18      | 2&3             |
| C093/02 | 2.00      | 17pter-q25, 18                                       | 3&4             |
| C101/02 | 1.50      | 2, 4, 20q11-ter                                      | 2&3             |
|         |           | 1, 3p                                                | 3&4             |
| C115/03 | 1.00      | 2p21-11, 17q21-ter, 18q21-ter                        | 2&3             |
| C120/03 | 1.00      | 22                                                   | 1&2             |
|         |           | 8, 18, X                                             | 2&3             |

|         |      |                                                                        |            |
|---------|------|------------------------------------------------------------------------|------------|
| C130/03 | 1.60 | 4, 5qcen-14, 7, 17pter-q21<br>12q, Xq                                  | 2&3<br>3&4 |
| C136/03 | 1.40 | 4p15-ter, 19pter-q13<br>6p12-ter, 8q22-ter, X                          | 1&2<br>2&3 |
| C138/03 | 1.90 | 7p11-22, 12, 15                                                        | 3&4        |
| C141/03 | 1.10 | 5q23-ter, 20q12-ter                                                    | 2&3        |
| C142/03 | 1.00 | 3q24-ter, X                                                            | 2&3        |
| C144/03 | 1.50 | 3p, 19<br>3q, 4q13-ter, 7, Xp22-q21                                    | 2&3<br>3&4 |
| C152/03 | 1.00 | 3q                                                                     | 2&3        |
| C162/04 | 2.16 | 10q, 12q, 18q, 21                                                      | 3&4        |
| C169/04 | 1.00 | 18q12-ter, 21qcen-21                                                   | 1&2        |
| C174/04 | 1.95 | 1p32-ter, 16, 19, 20, 22                                               | 3&4        |
| C178/04 | 1.00 | 5q, 17p, 21<br>1q, 13q22-ter, 16, 20                                   | 1&2<br>2&3 |
| C180/04 | 1.92 | 11p, 18q11-21,<br>3p, 7, 13q32-ter, 18q21-ter                          | 2&3<br>3&4 |
| C184/04 | 1.39 | 3p, 14, 17p, Xpter-q25<br>1pter-q32, 8q21-ter                          | 2&3<br>3&4 |
| C188/04 | 1.00 | 2, 5q, 6pter-q25, 10, 11, 15, 18<br>9q22-ter, 12p11-ter, 12q13-ter, 16 | 1&2<br>2&3 |
| C189/04 | 1.50 | 4q, Xp11-ter<br>17pter-q24                                             | 1&2<br>2&3 |
| C190/04 | 1.00 | 3p, 4, 8, 13                                                           | 1&2        |
| C193/04 | 1.00 | 1pcen-31, 3p, 4p15-qter, 5, 6p21-q24, 8, 14qcen -21, 18                | 1&2        |
| C194/04 | 1.00 | 5q, 9p, 11p15-q13, 18p12-ter, 22q13-ter<br>16q, 19p, 20                | 1&2<br>2&3 |
| C195/04 | 1.90 | 1p32-q12, 2p11-ter, 12q, 14, 15                                        | 3&4        |
| C196/04 | 1.00 | 2q12-q33, 4p13-qter, 17p, X                                            | 1&2        |
| C202/04 | 1.00 | 13q21-q32                                                              | 1&2        |
| C206/04 | 1.00 | 4, 13q21-q31<br>1p31-ter, 19, 22                                       | 1&2<br>2&3 |
| C215/04 | 1.00 | 11p, 13q21-ter<br>1p31-ter                                             | 1&2<br>2&3 |

<sup>a</sup>The aCGH ratios of the heterogeneous DNA region were significantly different from those of the homogeneous regions in all cases, as verified from ANOVA analysis.
